# Supplementary material for: Inhibition of PI3K promotes dilation of human small airways in a rho kinase‐dependent manner
Source: PubMed Central journal article supplement — Br J Pharmacol. 2016 Aug 3;173(18):2726–38. doi: 10.1111/bph.13542 (PMC4995285; doi:10.1111/bph.13542), 2016-08-03
Supplement: BPH-173-2726-s006.pdf [file BPH-173-2726-s006.pdf]

**Table 1S**

| <b>Inhibitor</b> | <b>IC<sub>50</sub> (kinase assay)</b> | <b>IC<sub>50</sub> in cells/tissue</b>                                                                                                      | <b>Citation</b>                                          |
|------------------|---------------------------------------|---------------------------------------------------------------------------------------------------------------------------------------------|----------------------------------------------------------|
| CAL-101          | p110 $\alpha$ = 820 nM                | pAKT following PDGF stimulation EC <sub>25</sub> = 10 $\mu$ M; pAKT following LPA stimulation EC <sub>50</sub> = 1.9 $\mu$ M in fibroblasts | Lannutti BJ <i>et al.</i> (2011) Blood, 117:591-594.     |
|                  | p110 $\beta$ = 565 nM                 |                                                                                                                                             |                                                          |
|                  | p110 $\gamma$ = 2.5 nM                |                                                                                                                                             |                                                          |
|                  | p110 $\delta$ = 89 nM                 |                                                                                                                                             |                                                          |
| LY294002         | PI3K = 1.4 $\mu$ M                    | BrdU uptake in aortic smooth muscle = 32 $\mu$ M                                                                                            | Vlahos CJ <i>et al.</i> (1994) JBC, 269:5241-5248.       |
| Y27632           | ROCK1 Ki = 0.22 $\mu$ M               | G1-S phase cell cycle progression in 3T3 cells = between 10 and 100 $\mu$ M                                                                 | Ishizaki <i>et al.</i> (2000) Mol Pharmacol, 57:976-983. |
|                  | ROCK2 Ki = 0.30 $\mu$ M               |                                                                                                                                             |                                                          |
