# Supplementary material for: Inhibition of PI3K promotes dilation of human small airways in a rho kinase‐dependent manner
Source: PubMed Central journal article supplement — Br J Pharmacol. 2016 Aug 3;173(18):2726–38. doi: 10.1111/bph.13542 (PMC4995285; doi:10.1111/bph.13542), 2016-08-03
Supplement: BPH-173-2726-s007.pdf [file BPH-173-2726-s007.pdf]

**Table 2S**

| <b>Age</b> | <b>Race</b>      | <b>Gender</b> | <b>Cause of Death</b> | <b>Asthma</b> |
|------------|------------------|---------------|-----------------------|---------------|
| 48         | Caucasian        | Female        | Asthma                | Yes           |
| 59         | Caucasian        | Female        | Asthma                | Yes           |
| 15         | Hispanic         | Female        | Asthma                | Yes           |
| 31         | African American | Male          | Asthma                | Yes           |
| 44         | Hispanic         | Male          | Asthma                | Yes           |
| 44         | Caucasian        | Female        | Asthma                | Yes           |
| 9          | Caucasian        | Male          | Asthma                | Yes           |
| 50         | Caucasian        | Male          | Stroke                | No            |
| 28         | Asian            | Male          | Head Trauma           | No            |
| 22         | Caucasian        | Female        | Head Trauma           | No            |
| 28         | African American | Female        | Stroke                | No            |
| 45         | Caucasian        | Male          | Overdose              | No            |
| 28         | African American | Male          | Gun shot wound        | No            |
| 24         | Caucasian        | Female        | Stroke                | No            |
| 52         | Caucasian        | Female        | Stroke                | No            |
| 21         | Caucasian        | Male          | Gun shot wound        | No            |
