# Supplementary material for: Inhibition of PI3K promotes dilation of human small airways in a rho kinase‐dependent manner
Source: PubMed Central journal article supplement — Br J Pharmacol. 2016 Aug 3;173(18):2726–38. doi: 10.1111/bph.13542 (PMC4995285; doi:10.1111/bph.13542), 2016-08-03
Supplement: BPH-173-2726-s008.pdf [file BPH-173-2726-s008.pdf]

**Table 3S**

| <b>Age</b> | <b>Race</b>      | <b>Gender</b> | <b>Cause of Death</b> |
|------------|------------------|---------------|-----------------------|
| 54         | Caucasian        | Male          | Stroke                |
| 20         | African American | Female        | Stroke                |
| 54         | Hispanic         | Male          | Stroke                |
| 22         | Caucasian        | Male          | Head Trauma           |
| 52         | Caucasian        | Male          | Head Trauma           |
| 41         | Hispanic         | Male          | Anoxia                |
| 53         | Caucasian        | Male          | Anoxia                |
| 50         | African American | Male          | Anoxia                |
| 28         | Caucasian        | Male          | Anoxia                |
| 17         | Hispanic         | Male          | Head Trauma           |
| 55         | Caucasian        | Female        | Head Trauma           |
| 22         | Caucasian        | Male          | Head Trauma           |
| 40         | African American | Male          | Stroke                |
| 49         | African American | Male          | Stroke                |
| 49         | Caucasian        | Male          | Stroke                |
| 34         | African American | Female        | Stroke                |
| 38         | Caucasian        | Male          | Head Trauma           |
| 14         | Hispanic         | Female        | Head Trauma           |
