# Supplementary figures and images for: Inhibition of PI3K promotes dilation of human small airways in a rho kinase‐dependent manner
Source: PubMed Central journal article supplement — Br J Pharmacol. 2016 Aug 3;173(18):2726–38. doi: 10.1111/bph.13542 (PMC4995285; doi:10.1111/bph.13542), 2016-08-03

Figure 1S

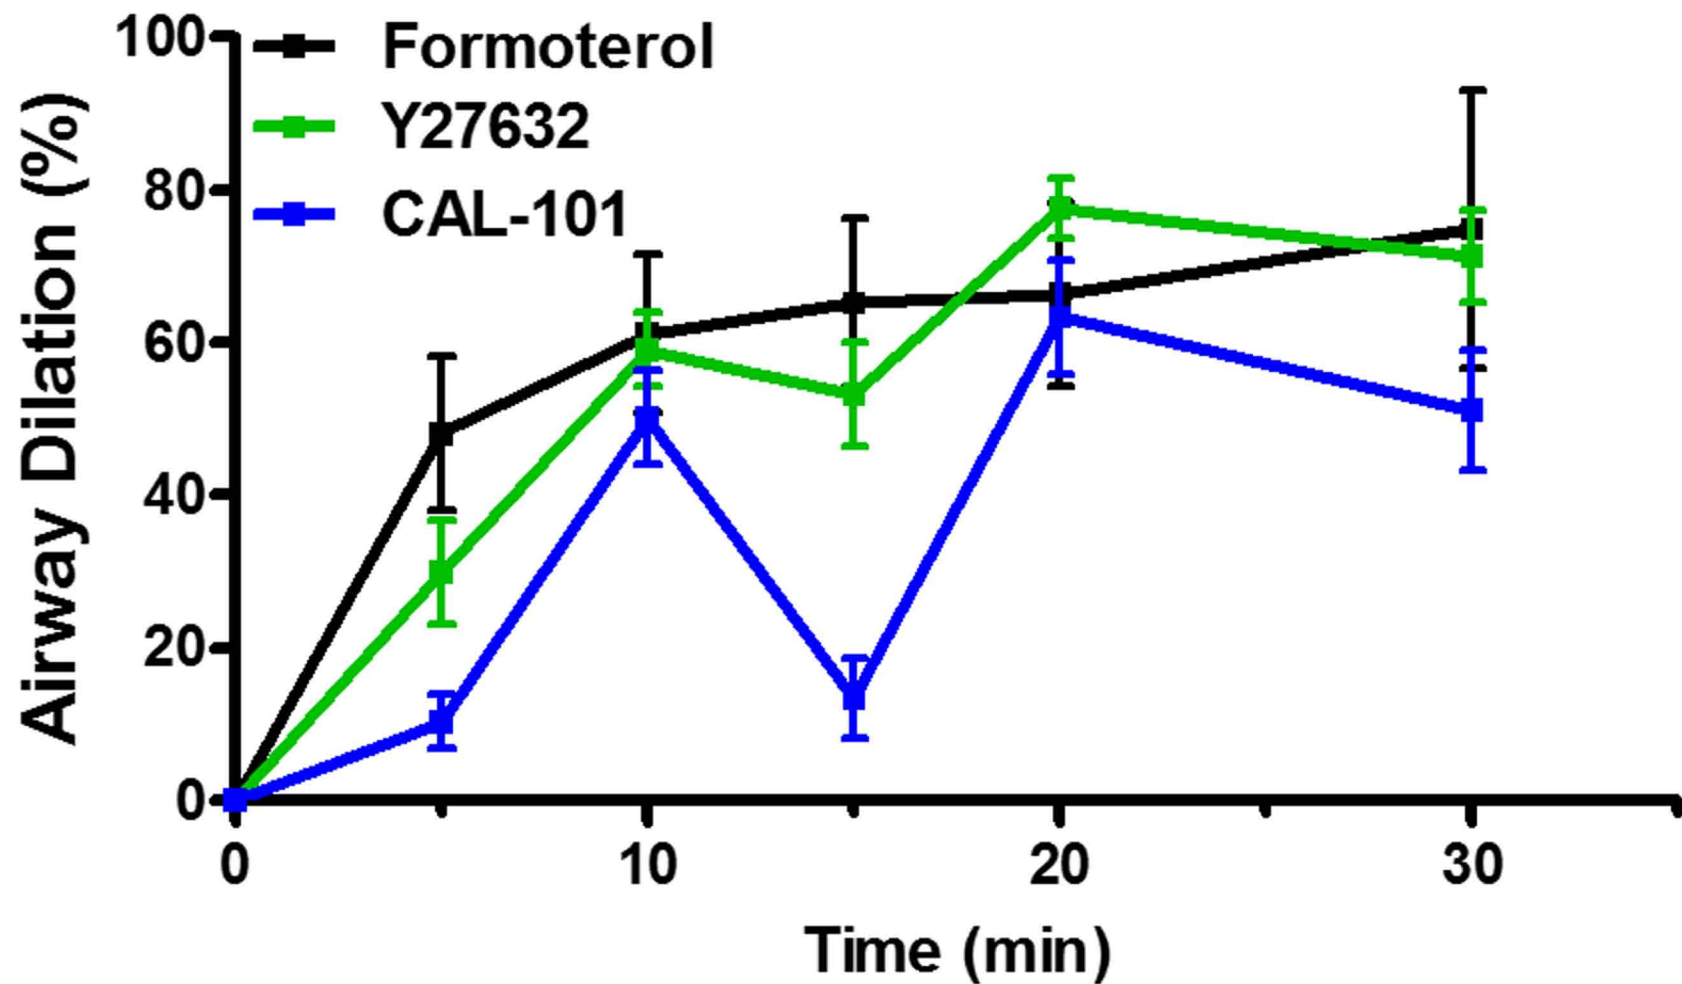

Supplement: BPH-173-2726-s001.pdf [file BPH-173-2726-s001.pdf]

**Figure 2S**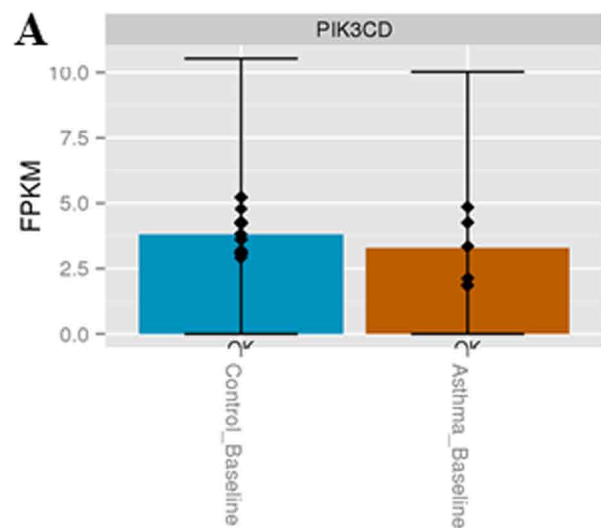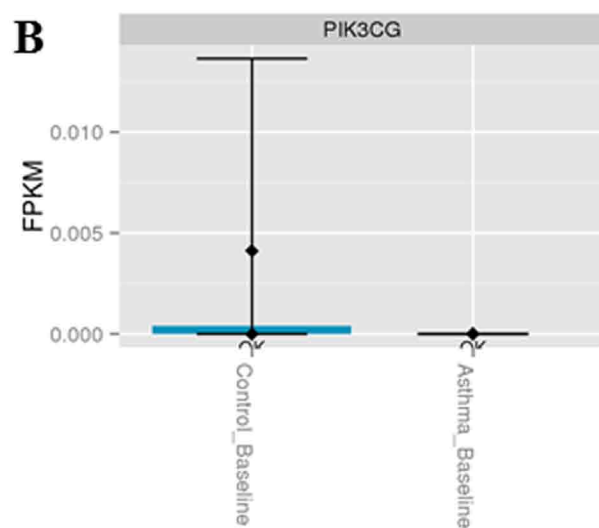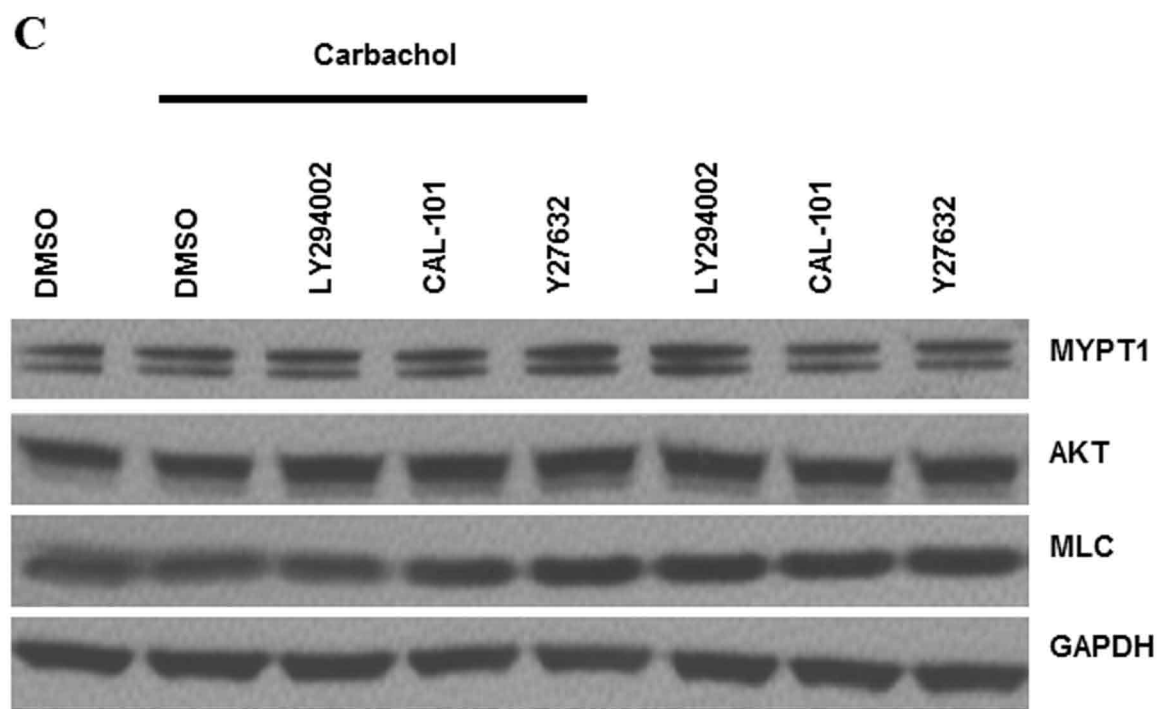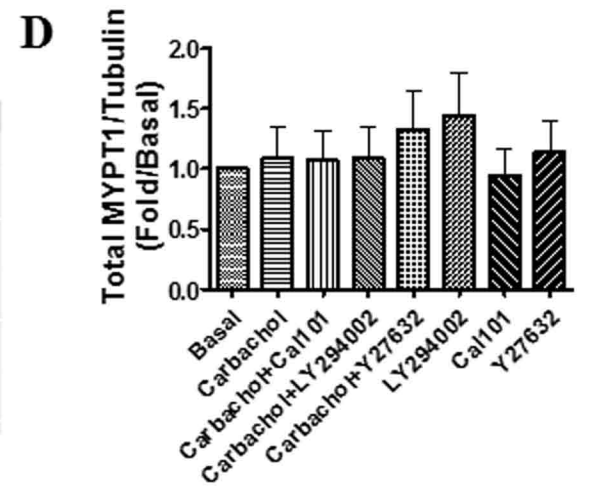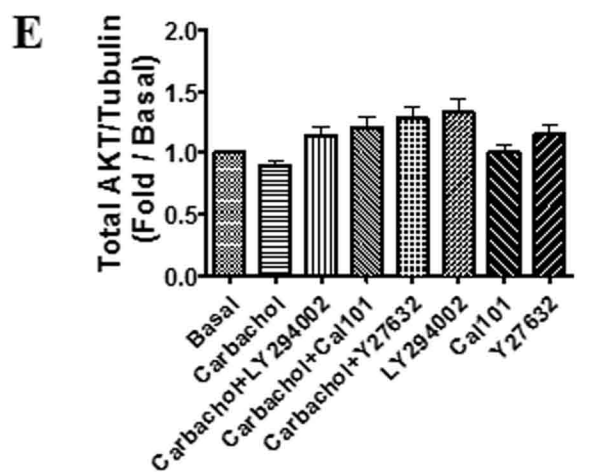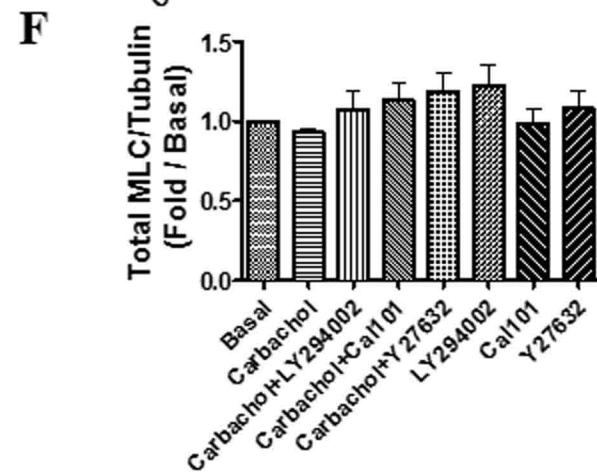

Supplement: BPH-173-2726-s002.pdf [file BPH-173-2726-s002.pdf]

Figure 3S

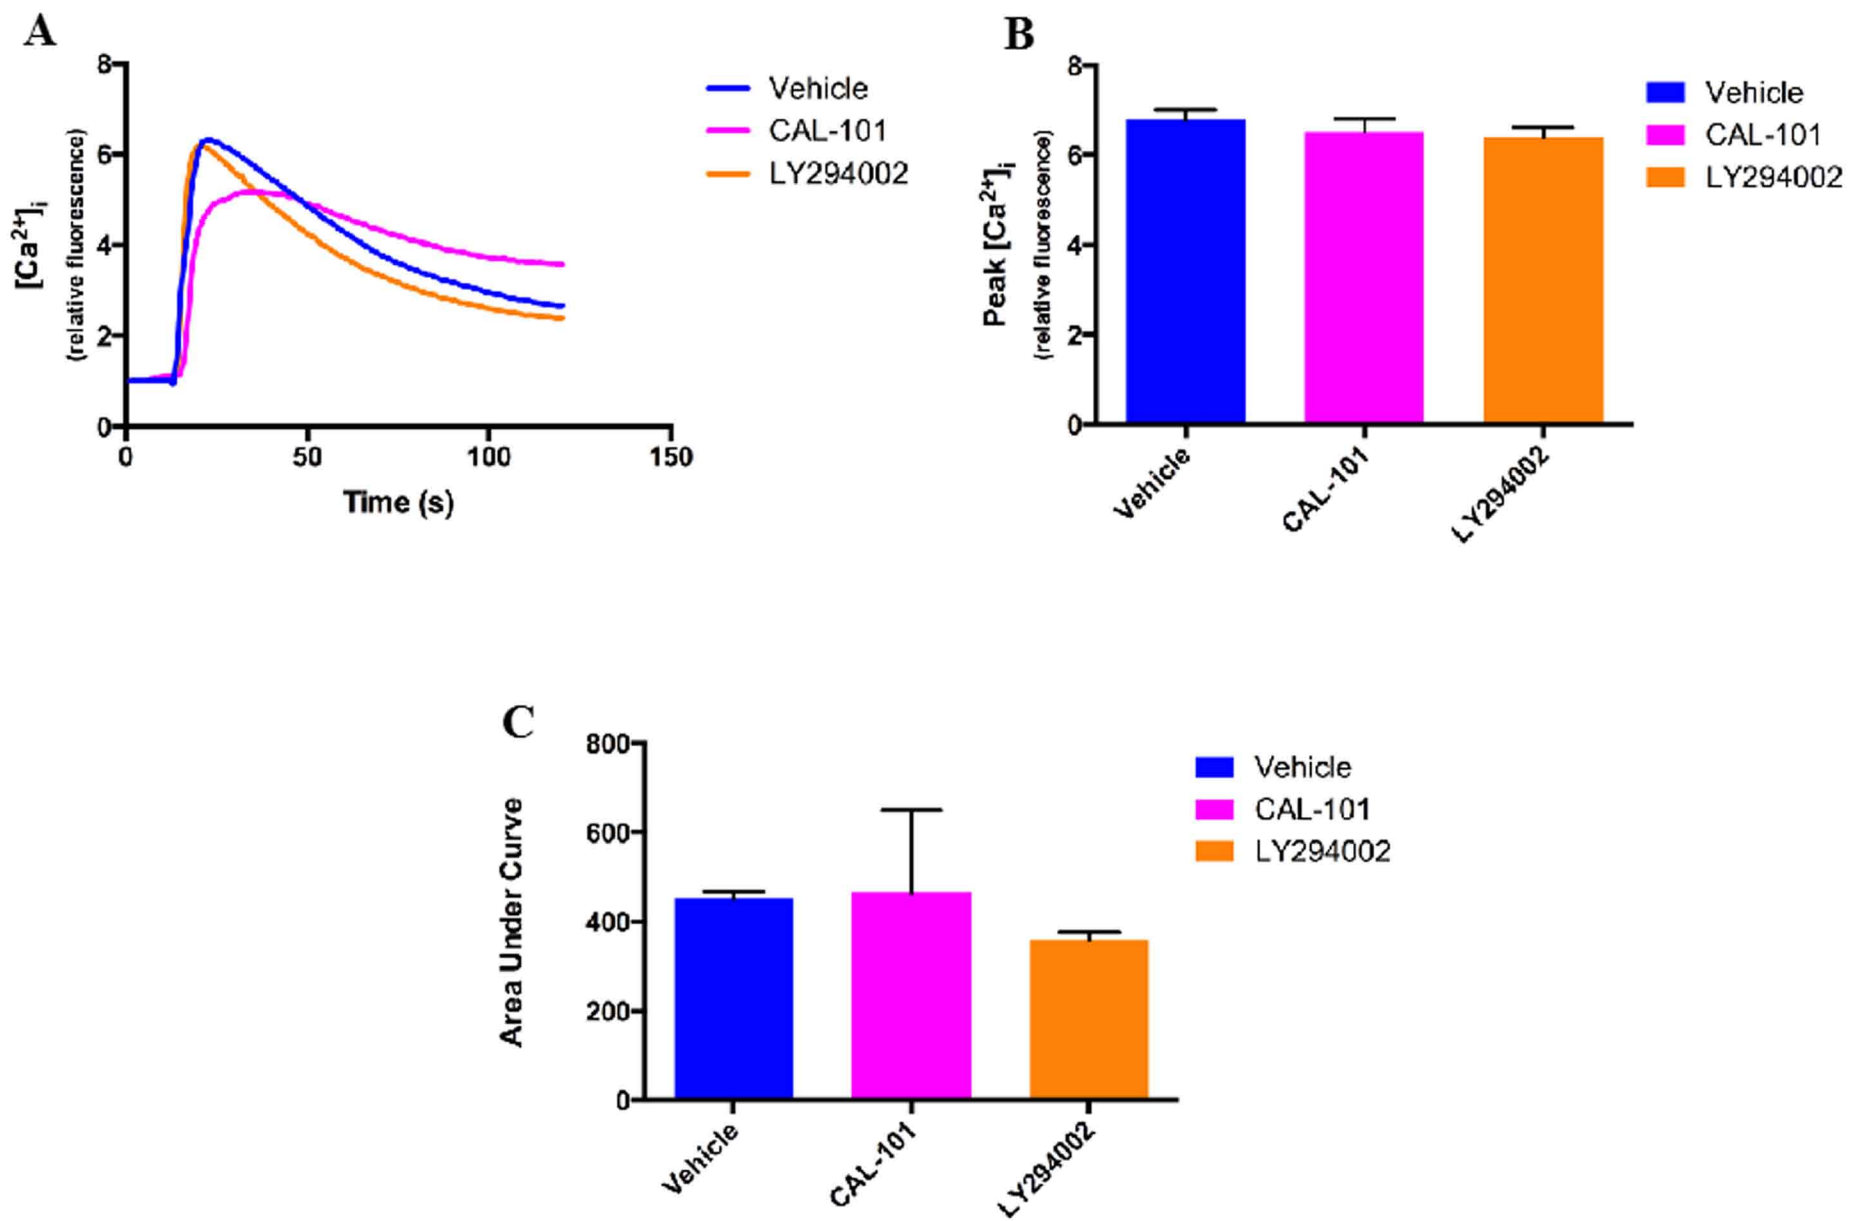

Supplement: BPH-173-2726-s003.pdf [file BPH-173-2726-s003.pdf]

Figure 4S

A

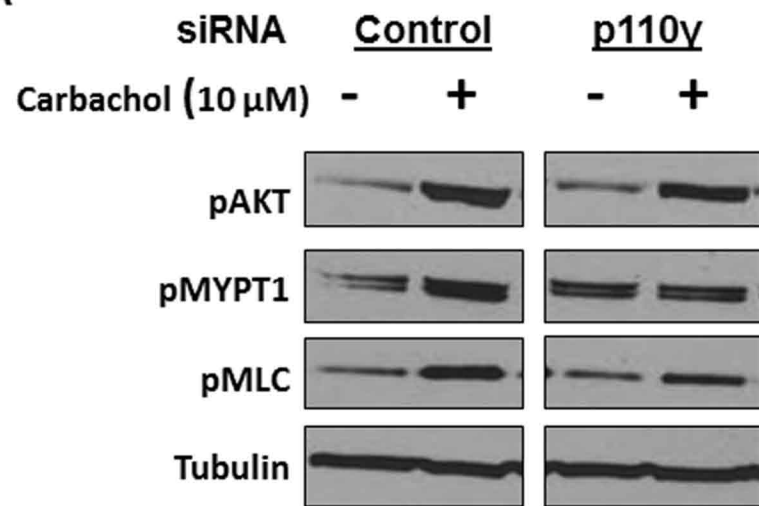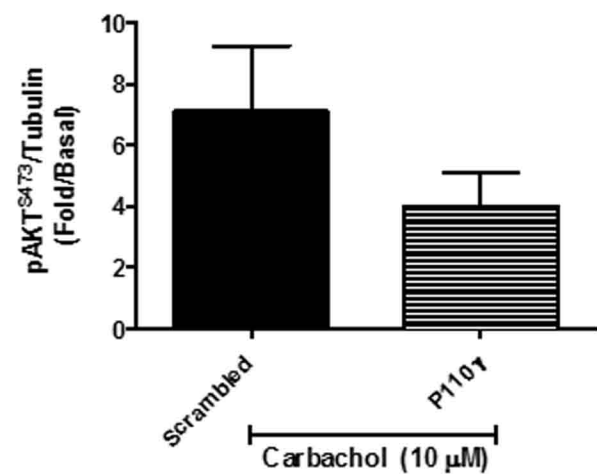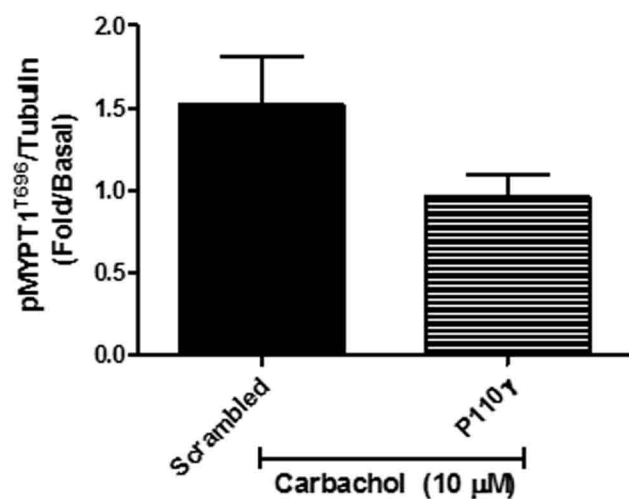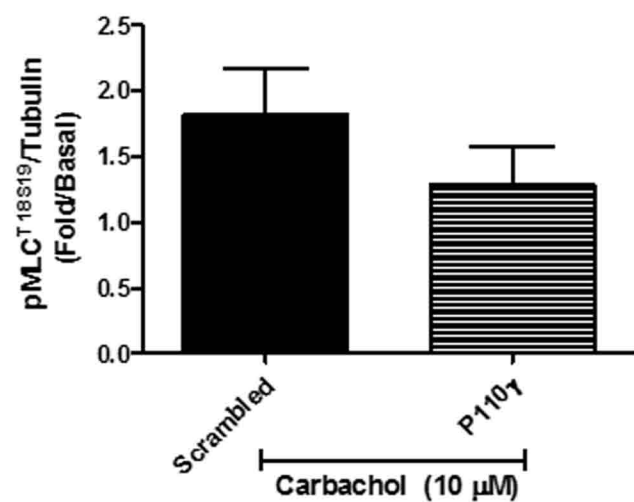

Supplement: BPH-173-2726-s004.pdf [file BPH-173-2726-s004.pdf]

Figure 5S

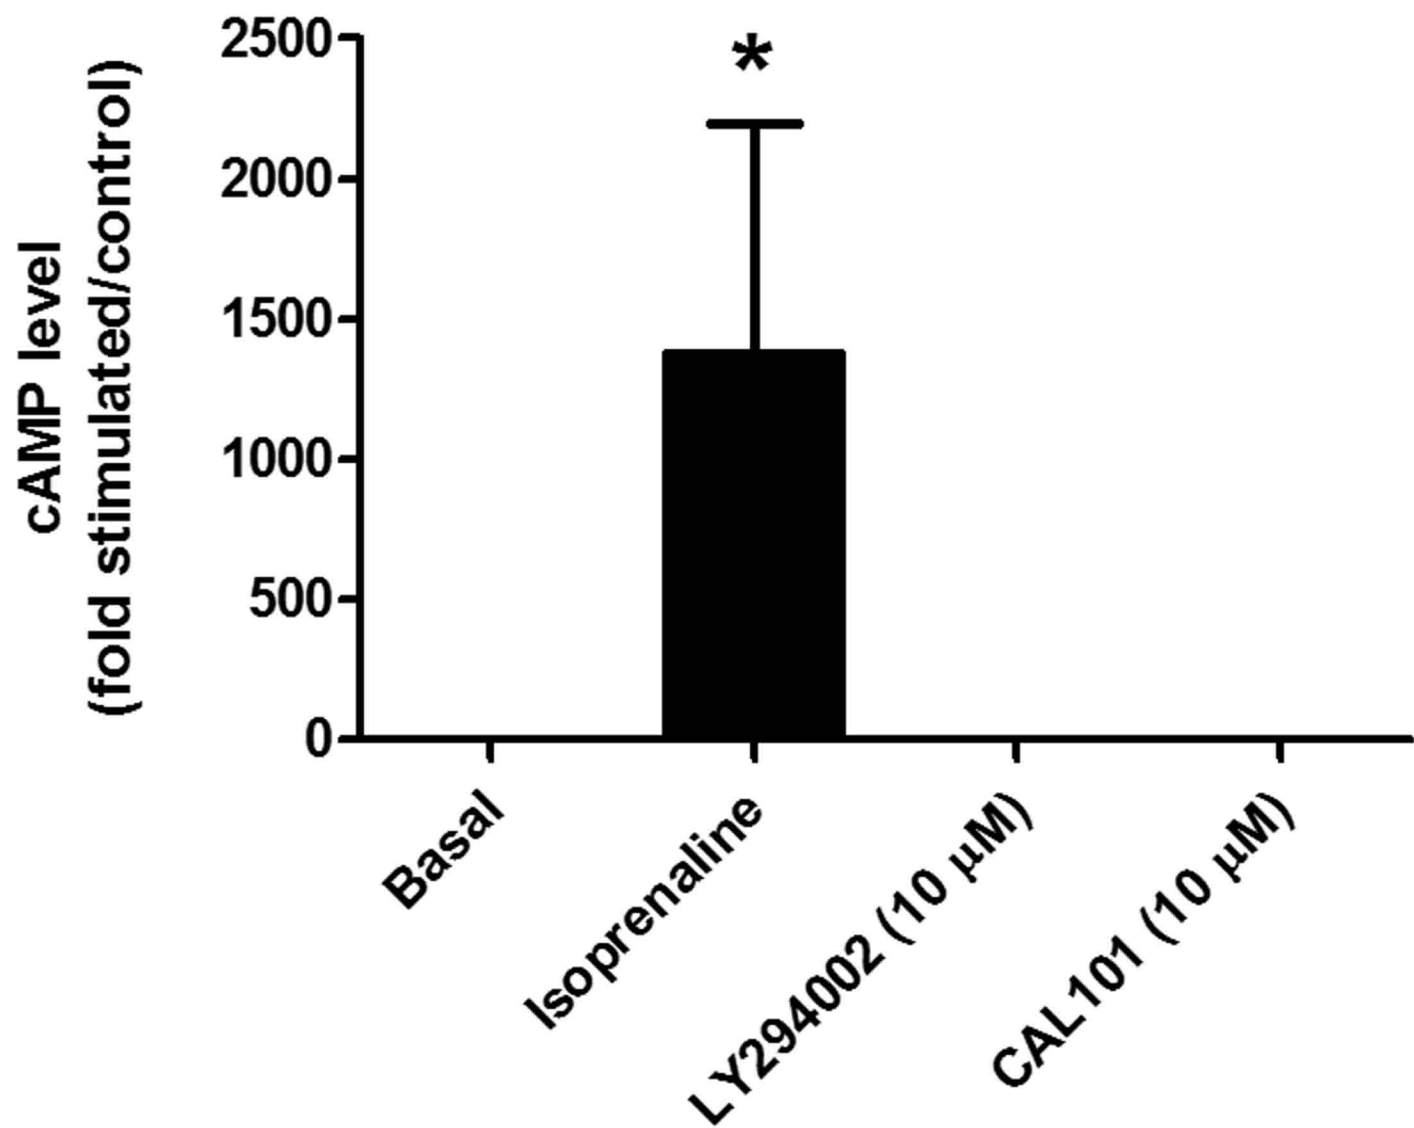

Supplement: BPH-173-2726-s005.pdf [file BPH-173-2726-s005.pdf]
